# Supplementary material
Source: MDPI journal article supplement (https://www.mdpi.com/2313-0105/9/12/586)
Supplement: s1 [file s1 › batteries-2700351-supplementary.pdf]

## Supporting information

# Hierarchical $\text{CaMn}_2\text{O}_4/\text{C}$ Network Framework toward Aqueous Zn Ion Hybrid Capacitors as Competitive Cathodes

Lifen Ding,<sup>1</sup> Qinchao Gao,<sup>2, 3\*</sup> Changzhou Yuan<sup>3</sup>

<sup>1</sup> School of Mechanical and Electronic Control Engineering, Beijing Jiaotong University, Beijing, 100044, P. R. China

<sup>2</sup> Shenzhen major industry investment group&tankeblue semiconductor co., Ltd, 518108, P. R. China

<sup>3</sup> School of Materials Science & Engineering, University of Jinan, Jinan, 250022, P. R. China

Corresponding: agaoqc\_me@163.com

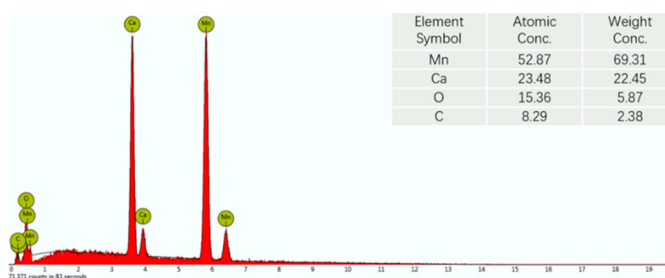

**Figure S1.** EDS spectrum of CaMn<sub>2</sub>O<sub>4</sub>/C along with the individual atom percentage (the inset)

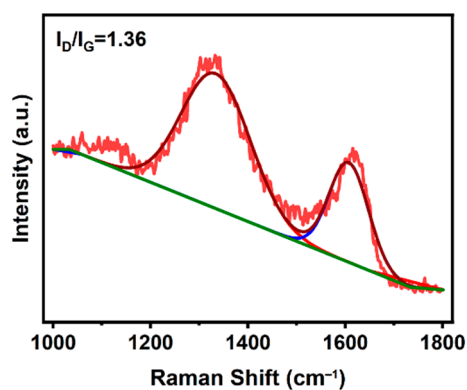

**Figure S2.** Raman spectra of the CaMn<sub>2</sub>O<sub>4</sub>/C sample.

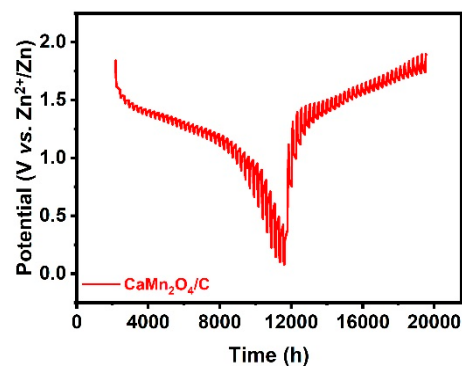

**Figure S3.** GITT curves over charge and discharge processes of the CaMn<sub>2</sub>O<sub>4</sub>/C cathode.
